# Supplementary material for: Self-reported depression and anxiety and healthcare professional interactions regarding smoking cessation and nicotine vaping: Findings from 2018 International Tobacco Control Four Country Smoking and Vaping (ITC 4CV) Survey
Source: PubMed Central journal article supplement (PMC10391919; doi:10.18332/tpc/168288), 2023-08-02
Supplement: TPC-9-26-s1.pdf [file TPC-9-26-s1.pdf]

SUPPLEMENTARY TABLES

**Self-reported depression and anxiety and healthcare professional interactions regarding smoking cessation and nicotine vaping: Findings from 2018 International Tobacco Control (ITC) Four Country Smoking and Vaping Survey**

Supplementary table 1. Mental health condition and covariates by healthcare professional interactions regarding smoking cessation and nicotine vaping. Cross-sectional International Tobacco Control Four Country Smoking and Vaping (ITC 4CV) Survey, 2018.

| Variable                        | Categories                      | Visiting a health professional (n*= 11040) |             |                    | Advice to quit smoking from health professional (n*= 8319) |             |                    | Discussion about nicotine vaping products (n*= 8280) |           |                    | Positive recommendation to use nicotine vaping products (n*= 859) |            |                    |
|---------------------------------|---------------------------------|--------------------------------------------|-------------|--------------------|------------------------------------------------------------|-------------|--------------------|------------------------------------------------------|-----------|--------------------|-------------------------------------------------------------------|------------|--------------------|
|                                 |                                 | No                                         | Yes         | Refused/don't know | No                                                         | Yes         | Refused/don't know | No                                                   | Yes       | Refused/don't know | No                                                                | Yes        | Refused/don't know |
| <b>TOTAL</b>                    |                                 | 2599* (25.2**)                             | 8319 (74)   | 122 (0.7)          | 4087 (51.2)                                                | 4101 (47)   | 131 (1.7)          | 7341 (93.1)                                          | 859 (6.1) | 80 (0.8)           | 562 (65.1)                                                        | 288 (32.7) | 9 (2.1)            |
| <b>Gender</b>                   | <b>Male</b>                     | 1523 (30.6)                                | 3777 (68.5) | 72 (0.9)           | 1775 (49.5)                                                | 1940 (48.5) | 62 (2)             | 3232 (92.3)                                          | 488 (6.7) | 41 (1)             | 313 (60.1)                                                        | 170 (36.9) | 5 (2.9)            |
|                                 | <b>Female</b>                   | 1076 (18.9)                                | 4542 (80.5) | 50 (0.6)           | 2312 (53)                                                  | 2161 (45.5) | 69 (1.5)           | 4109 (93.9)                                          | 371 (5.5) | 39 (0.6)           | 249 (71.4)                                                        | 118 (27.6) | 4 (1.1)            |
| <b>Age group (years)</b>        | <b>18-24</b>                    | 683 (33.2)                                 | 1427 (65)   | 57 (1.8)           | 794 (62.6)                                                 | 610 (35.8)  | 23 (1.6)           | 1135 (90.2)                                          | 262 (8.5) | 21 (1.2)           | 168 (65.4)                                                        | 93 (34.6)  | 1 (0.1)            |
|                                 | <b>25-39</b>                    | 757 (32.7)                                 | 1617 (66.5) | 32 (0.8)           | 881 (56.1)                                                 | 708 (41.5)  | 28 (2.3)           | 1373 (92.3)                                          | 215 (6.6) | 22 (1.1)           | 129 (53.9)                                                        | 83 (43.3)  | 3 (2.8)            |
|                                 | <b>40-54</b>                    | 650 (23.3)                                 | 2198 (75.9) | 24 (0.8)           | 1077 (51.2)                                                | 1088 (47.4) | 33 (1.4)           | 1979 (93.4)                                          | 187 (5.8) | 21 (0.8)           | 128 (72.3)                                                        | 58 (26.8)  | 1 (0.9)            |
|                                 | <b>55 and up</b>                | 509 (15.4)                                 | 3077 (84.4) | 9 (0.2)            | 1335 (43.6)                                                | 1695 (54.9) | 47 (1.5)           | 2854 (94.4)                                          | 195 (5.3) | 16 (0.4)           | 137 (71.1)                                                        | 54 (25.4)  | 4 (3.5)            |
| <b>Ethnicity</b>                | <b>Minority group</b>           | 438 (27)                                   | 1168 (71.7) | 30 (1.3)           | 547 (48.2)                                                 | 603 (50)    | 18 (1.8)           | 952 (89.9)                                           | 190 (8.1) | 20 (2)             | 124 (66.5)                                                        | 66 (33.5)  | 0 (0)              |
|                                 | <b>Majority group</b>           | 2161 (25)                                  | 7151 (74.4) | 92 (0.6)           | 3540 (51.7)                                                | 3498 (46.6) | 113 (1.7)          | 6389 (93.6)                                          | 669 (5.8) | 60 (0.6)           | 438 (64.9)                                                        | 222 (32.6) | 9 (2.5)            |
| <b>Education</b>                | <b>Low</b>                      | 861 (25.3)                                 | 2616 (74)   | 42 (0.7)           | 1283 (47)                                                  | 1283 (50.6) | 50 (2.4)           | 2351 (93.9)                                          | 224 (5.2) | 26 (0.9)           | 151 (74)                                                          | 72 (26)    | 1 (0)              |
|                                 | <b>Moderate</b>                 | 1034 (25.3)                                | 3543 (73.8) | 50 (0.8)           | 1723 (51.7)                                                | 1771 (46.9) | 49 (1.4)           | 3148 (92.9)                                          | 346 (6.4) | 35 (0.7)           | 244 (64.1)                                                        | 97 (32.1)  | 5 (3.8)            |
|                                 | <b>High</b>                     | 704 (24.9)                                 | 2160 (74.6) | 30 (0.5)           | 1081 (56.3)                                                | 1047 (42)   | 32 (1.7)           | 1842 (92.3)                                          | 289 (6.8) | 19 (0.9)           | 167 (57.5)                                                        | 119 (41.6) | 3 (1)              |
| <b>Income</b>                   | <b>Low</b>                      | 767 (23.3)                                 | 2725 (76)   | 41 (0.7)           | 1330 (50)                                                  | 1347 (48.4) | 48 (1.6)           | 2435 (93.6)                                          | 242 (5.4) | 32 (1.1)           | 170 (67.8)                                                        | 67 (28.4)  | 5 (3.8)            |
|                                 | <b>Moderate</b>                 | 982 (27.1)                                 | 2673 (72)   | 51 (0.9)           | 1296 (50.8)                                                | 1331 (46.7) | 46 (2.5)           | 2360 (93)                                            | 278 (6.1) | 24 (0.9)           | 183 (66.7)                                                        | 94 (32.5)  | 1 (0.8)            |
|                                 | <b>High</b>                     | 728 (24.5)                                 | 2499 (74.8) | 22 (0.7)           | 1229 (52.7)                                                | 1239 (46.1) | 31 (1.2)           | 2161 (92.6)                                          | 308 (6.9) | 21 (0.5)           | 187 (59.8)                                                        | 118 (38)   | 3 (2.3)            |
|                                 | <b>No answer</b>                | 122 (28.7)                                 | 422 (70.5)  | 8 (0.8)            | 232 (53.7)                                                 | 184 (45.4)  | 6 (0.8)            | 385 (93.5)                                           | 31 (6)    | 3 (0.5)            | 22 (77.4)                                                         | 9 (22.6)   | 0 (0)              |
| <b>Cigarette smoking status</b> | <b>Daily</b>                    | 1895 (25.1)                                | 6142 (74.3) | 77 (0.5)           | 2797 (47.5)                                                | 3252 (51)   | 93 (1.6)           | 5451 (93.5)                                          | 611 (5.9) | 49 (0.6)           | 380 (64.5)                                                        | 227 (34.1) | 4 (1.4)            |
|                                 | <b>Non-daily</b>                | 488 (29.5)                                 | 1143 (68.3) | 37 (2.2)           | 671 (66.4)                                                 | 455 (31.3)  | 17 (2.3)           | 939 (90.2)                                           | 181 (8)   | 19 (1.7)           | 132 (68.4)                                                        | 48 (31.5)  | 1 (0.2)            |
|                                 | <b>Former</b>                   | 216 (21.2)                                 | 1034 (78.2) | 8 (0.6)            | 619 (63.1)                                                 | 394 (34.7)  | 21 (2.3)           | 951 (93.3)                                           | 67 (5.4)  | 12 (1.2)           | 50 (65.2)                                                         | 13 (24.1)  | 4 (10.7)           |
| <b>Problematic alcohol use</b>  | <b>No</b>                       | 1458 (23)                                  | 5451 (76.5) | 42 (0.5)           | 2633 (50.3)                                                | 2735 (48.1) | 83 (1.7)           | 4865 (93.3)                                          | 501 (5.7) | 58 (1)             | 336 (70.2)                                                        | 160 (28.4) | 5 (1.4)            |
|                                 | <b>Yes</b>                      | 1009 (28.5)                                | 2599 (70.6) | 61 (0.9)           | 1298 (52.8)                                                | 1263 (45.3) | 38 (1.8)           | 2229 (92.4)                                          | 340 (7.2) | 19 (0.4)           | 216 (57)                                                          | 120 (39.6) | 4 (3.4)            |
|                                 | <b>No answer</b>                | 132 (34)                                   | 269 (63.3)  | 19 (2.8)           | 156 (55.2)                                                 | 103 (42.2)  | 10 (2.7)           | 247 (95.3)                                           | 18 (4.3)  | 3 (0.4)            | 10 (66.7)                                                         | 8 (33.3)   | 0 (0)              |
| <b>Mental health status</b>     | <b>No depression or anxiety</b> | 2049 (30)                                  | 5279 (69.3) | 65 (0.7)           | 2650 (51.9)                                                | 2550 (46.4) | 79 (1.7)           | 4738 (93.7)                                          | 459 (5.3) | 56 (1)             | 302 (67.2)                                                        | 150 (30.6) | 7 (2.2)            |
|                                 | <b>Depression only</b>          | 137 (15.2)                                 | 763 (84.2)  | 18 (0.6)           | 312 (42)                                                   | 437 (55.6)  | 14 (2.4)           | 643 (92.2)                                           | 110 (7.3) | 7 (0.5)            | 68 (61.2)                                                         | 42 (38.8)  | 0 (0)              |
|                                 | <b>Anxiety only</b>             | 162 (17.6)                                 | 662 (80.8)  | 20 (1.6)           | 333 (55)                                                   | 317 (43.4)  | 12 (1.7)           | 564 (92.9)                                           | 89 (6.9)  | 6 (0.3)            | 61 (62.9)                                                         | 28 (37.1)  | 0 (0)              |
|                                 | <b>Depression and anxiety</b>   | 251 (12.3)                                 | 1615 (87)   | 19 (0.7)           | 792 (51.9)                                                 | 797 (46.6)  | 26 (1.5)           | 1396 (91.5)                                          | 201 (7.9) | 11 (0.5)           | 131 (62.8)                                                        | 68 (33.8)  | 2 (3.5)            |
| <b>Country</b>                  | <b>Australia</b>                | 145 (14.2)                                 | 1222 (85.4) | 5 (0.4)            | 553 (45.3)                                                 | 650 (52.2)  | 19 (2.4)           | 1155 (96.7)                                          | 52 (3)    | 7 (0.3)            | 40 (83.4)                                                         | 12 (16.6)  | 0 (0)              |
|                                 | <b>Canada</b>                   | 659 (20.6)                                 | 2473 (78.9) | 25 (0.5)           | 1285 (54)                                                  | 1159 (45)   | 29 (1)             | 2217 (94.1)                                          | 228 (5.1) | 22 (0.8)           | 162 (63.8)                                                        | 64 (34.6)  | 2 (1.6)            |
|                                 | <b>England</b>                  | 1325 (32.6)                                | 2822 (66.4) | 70 (1)             | 1539 (57.1)                                                | 1242 (41.6) | 41 (1.3)           | 2385 (90.9)                                          | 389 (8.4) | 31 (0.7)           | 216 (58.7)                                                        | 166 (37.6) | 7 (3.6)            |
|                                 | <b>US</b>                       | 470 (24.5)                                 | 1802 (74.8) | 22 (0.8)           | 710 (41.9)                                                 | 1050 (55.1) | 42 (3)             | 1584 (92.7)                                          | 190 (5.9) | 20 (1.4)           | 144 (75.2)                                                        | 46 (24.8)  | 0 (0)              |

\* n is unweighted frequency, total number of respondents who were asked this survey question

+ Unweighted frequency of respondents who responded to the outcome

++ Weighted proportion of respondents who responded to the outcome. Denominator is frequency of respondents who responded 'Yes' and 'No' to the outcome, including refused and don't know responses

Supplementary Table 2. Odds ratios, with 95% CI for all independent variables and covariates for all of the logistic regression models, for each outcome measure.

- Model 1: unadjusted model with mental health condition as the only independent variable
- Model 2: model adjusted for country, sex, age, education, ethnicity, and income
- Model 3 (fully adjusted): adjusted for country, sex, age, education, ethnicity, and income, cigarette smoking status and problematic alcohol use
- Model 4 (country-differences): adjusted for country, gender, age, education, income, ethnicity, cigarette smoking status, problematic alcohol use, and mental health\*country interaction term

## RQ1: Visiting a health professional

Supplementary Table 2a

### Model 1

| Variable      | Category                    | beta | OR   | Lower 95% CI | Upper 95% CI | p-value |
|---------------|-----------------------------|------|------|--------------|--------------|---------|
|               | (Intercept)                 | 0.84 | 2.31 | 2.20         | 2.42         | 0.000   |
| Mental health | No depression/anxiety (ref) |      | 1.00 |              |              |         |
|               | Depression only             | 0.88 | 2.40 | 1.98         | 2.93         | 0.000   |
|               | Anxiety only                | 0.69 | 2.00 | 1.64         | 2.44         | 0.000   |
|               | Depression and anxiety      | 1.12 | 3.08 | 2.65         | 3.58         | 0.000   |

Supplementary Table 2b

### Model 2

| Variable      | Category                    | beta  | OR   | Lower 95% CI | Upper 95% CI | p-value |
|---------------|-----------------------------|-------|------|--------------|--------------|---------|
|               | (Intercept)                 | -0.63 | 0.53 | 0.42         | 0.67         | 0.000   |
| Mental health | No depression/anxiety (ref) |       | 1.00 |              |              |         |
|               | Depression only             | 0.96  | 2.62 | 2.15         | 3.23         | 0.000   |
|               | Anxiety only                | 0.73  | 2.08 | 1.70         | 2.57         | 0.000   |
|               | Depression and anxiety      | 1.31  | 3.71 | 3.17         | 4.36         | 0.000   |
| Gender        | Male (ref)                  |       | 1.00 |              |              |         |
|               | Female                      | 0.68  | 1.98 | 1.79         | 2.18         | 0.000   |
| Age           | 18-24 (ref)                 |       | 1.00 |              |              |         |
|               | 25-39                       | 0.09  | 1.09 | 0.93         | 1.28         | 0.287   |
|               | 40-54                       | 0.67  | 1.96 | 1.66         | 2.31         | 0.000   |
|               | 55 and up                   | 1.35  | 3.84 | 3.22         | 4.58         | 0.000   |

|           |                |       |      |      |      |       |
|-----------|----------------|-------|------|------|------|-------|
| Ethnicity | Minority group |       | 1.00 |      |      |       |
|           | Majority group | -0.07 | 0.94 | 0.81 | 1.07 | 0.339 |
| Education | Low (ref)      |       | 1.00 |      |      |       |
|           | Moderate       | 0.24  | 1.27 | 1.14 | 1.42 | 0.000 |
|           | High           | 0.29  | 1.33 | 1.16 | 1.53 | 0.000 |
| Income    | Low (ref)      |       | 1.00 |      |      |       |
|           | Moderate       | 0.11  | 1.11 | 0.99 | 1.25 | 0.083 |
|           | High           | 0.23  | 1.26 | 1.11 | 1.43 | 0.000 |
|           | No answer      | -0.09 | 0.91 | 0.73 | 1.14 | 0.418 |
| Country   | England (ref)  |       | 1.00 |      |      |       |
|           | Australia      | 1.19  | 3.30 | 2.77 | 3.95 | 0.000 |
|           | Canada         | 0.65  | 1.91 | 1.69 | 2.15 | 0.000 |
|           | US             | 0.43  | 1.54 | 1.35 | 1.75 | 0.000 |

Supplementary Table 2c

Model 3 (fully adjusted)

| Variable      | Category                    | beta  | OR   | Lower 95% CI | Upper 95% CI | p-value |
|---------------|-----------------------------|-------|------|--------------|--------------|---------|
|               | (Intercept)                 | -0.57 | 0.57 | 0.45         | 0.72         | 0.000   |
| Mental health | No depression/anxiety (ref) |       | 1.00 |              |              |         |
|               | Depression only             | 0.98  | 2.65 | 2.17         | 3.27         | 0.000   |
|               | Anxiety only                | 0.73  | 2.08 | 1.70         | 2.57         | 0.000   |
|               | Depression and anxiety      | 1.32  | 3.74 | 3.19         | 4.40         | 0.000   |
| Gender        | Male (ref)                  |       | 1.00 |              |              |         |
|               | Female                      | 0.67  | 1.95 | 1.77         | 2.15         | 0.000   |
| Age           | 18-24 (ref)                 |       | 1.00 |              |              |         |
|               | 25-39                       | 0.06  | 1.06 | 0.90         | 1.24         | 0.468   |
|               | 40-54                       | 0.66  | 1.93 | 1.63         | 2.29         | 0.000   |
|               | 55 and up                   | 1.32  | 3.75 | 3.14         | 4.49         | 0.000   |
| Ethnicity     | Minority group              |       | 1.00 |              |              |         |
|               | Majority group              | -0.07 | 0.93 | 0.81         | 1.07         | 0.305   |
| Education     | Low (ref)                   |       | 1.00 |              |              |         |
|               | Moderate                    | 0.24  | 1.27 | 1.13         | 1.42         | 0.000   |
|               | High                        | 0.27  | 1.31 | 1.14         | 1.50         | 0.000   |
| Income        | Low (ref)                   |       | 1.00 |              |              |         |
|               | Moderate                    | 0.10  | 1.10 | 0.98         | 1.24         | 0.109   |

|                               |               |       |      |      |      |       |
|-------------------------------|---------------|-------|------|------|------|-------|
|                               | High          | 0.22  | 1.25 | 1.10 | 1.42 | 0.001 |
|                               | No answer     | -0.08 | 0.92 | 0.74 | 1.15 | 0.471 |
| Country                       | England (ref) |       | 1.00 |      |      |       |
|                               | Australia     | 1.19  | 3.27 | 2.75 | 3.91 | 0.000 |
|                               | Canada        | 0.63  | 1.88 | 1.67 | 2.12 | 0.000 |
|                               | US            | 0.40  | 1.49 | 1.31 | 1.70 | 0.000 |
| Problematic alcohol use (Y/N) | No            |       | 1.00 |      |      |       |
|                               | Yes           | -0.08 | 0.93 | 0.84 | 1.02 | 0.133 |
|                               | No answer     | -0.37 | 0.69 | 0.55 | 0.87 | 0.002 |
| Cigarette smoking status      | Daily (ref)   |       | 1.00 |      |      |       |
|                               | Non-daily     | -0.08 | 0.92 | 0.80 | 1.06 | 0.257 |
|                               | Former        | 0.35  | 1.42 | 1.21 | 1.67 | 0.000 |

Supplementary Table 2d

Model 4 (country-differences)

| Variable      | Category                    | beta  | OR   | Lower 95% CI | Upper 95% CI | p-value |
|---------------|-----------------------------|-------|------|--------------|--------------|---------|
|               | (Intercept)                 | -0.61 | 0.54 | 0.43         | 0.69         | 0.000   |
| Mental health | No depression/anxiety (ref) |       | 1.00 |              |              |         |
|               | Depression only             | 1.27  | 3.58 | 2.70         | 4.81         | 0.000   |
|               | Anxiety only                | 0.77  | 2.17 | 1.55         | 3.08         | 0.000   |
|               | Depression and anxiety      | 1.56  | 4.76 | 3.77         | 6.06         | 0.000   |
| Country       | England (ref)               |       | 1.00 |              |              |         |
|               | Australia                   | 1.26  | 3.53 | 2.90         | 4.32         | 0.000   |
|               | Canada                      | 0.73  | 2.08 | 1.82         | 2.38         | 0.000   |
|               | US                          | 0.47  | 1.60 | 1.38         | 1.85         | 0.000   |
| Gender        | Male (ref)                  |       | 1.00 |              |              |         |
|               | Female                      | 0.67  | 1.96 | 1.78         | 2.16         | 0.000   |
| Age           | 18-24 (ref)                 |       | 1.00 |              |              |         |
|               | 25-39                       | 0.06  | 1.06 | 0.90         | 1.24         | 0.484   |
|               | 40-54                       | 0.65  | 1.92 | 1.62         | 2.28         | 0.000   |
|               | 55 and up                   | 1.32  | 3.75 | 3.13         | 4.49         | 0.000   |
| Ethnicity     | Minority group              |       | 1.00 |              |              |         |
|               | Majority group              | -0.07 | 0.93 | 0.81         | 1.07         | 0.296   |
| Education     | Low (ref)                   |       | 1.00 |              |              |         |
|               | Moderate                    | 0.23  | 1.26 | 1.13         | 1.41         | 0.000   |

|                                        |                                     |       |      |      |      |       |
|----------------------------------------|-------------------------------------|-------|------|------|------|-------|
|                                        | High                                | 0.27  | 1.31 | 1.14 | 1.51 | 0.000 |
| Income                                 | Low (ref)                           |       | 1.00 |      |      |       |
|                                        | Moderate                            | 0.10  | 1.11 | 0.98 | 1.25 | 0.100 |
|                                        | High                                | 0.23  | 1.25 | 1.10 | 1.43 | 0.001 |
|                                        | No answer                           | -0.07 | 0.93 | 0.75 | 1.16 | 0.518 |
| Problematic alcohol use (Y/N)          | No                                  |       | 1.00 |      |      |       |
|                                        | Yes                                 | -0.08 | 0.92 | 0.84 | 1.02 | 0.123 |
|                                        | No answer                           | -0.38 | 0.68 | 0.54 | 0.86 | 0.001 |
| Cigarette smoking status               | Daily (ref)                         |       | 1.00 |      |      |       |
|                                        | Non-daily                           | -0.09 | 0.91 | 0.79 | 1.05 | 0.209 |
|                                        | Former                              | 0.34  | 1.41 | 1.20 | 1.66 | 0.000 |
| Mental health*country interaction term | No depression/anxiety*England (ref) |       | 1.00 |      |      |       |
|                                        | Depression only*Australia           | -0.59 | 0.55 | 0.28 | 1.18 | 0.103 |
|                                        | Anxiety only*Australia              | -0.65 | 0.52 | 0.27 | 1.05 | 0.060 |
|                                        | Depression and anxiety*Australia    | 0.08  | 1.09 | 0.58 | 2.21 | 0.802 |
|                                        | Depression only*Canada              | -0.62 | 0.54 | 0.32 | 0.92 | 0.021 |
|                                        | Anxiety only*Canada                 | -0.11 | 0.89 | 0.54 | 1.49 | 0.659 |
|                                        | Depression and anxiety*Canada       | -0.64 | 0.53 | 0.36 | 0.78 | 0.001 |
|                                        | Depression only*US                  | -0.63 | 0.53 | 0.31 | 0.91 | 0.020 |
|                                        | Anxiety only*US                     | 0.24  | 1.27 | 0.72 | 2.27 | 0.412 |
|                                        | Depression and anxiety*US           | -0.44 | 0.64 | 0.44 | 0.95 | 0.027 |

Likelihood-ratio test between Model 3 (fully adjusted) and Model 4 (country-differences): p=0.002

## RQ2: Advice to quit smoking from health professional

Supplementary Table 2e

### Model 1

| Variable      | Category                    | beta  | OR   | Lower 95% CI | Upper 95% CI | p-value |
|---------------|-----------------------------|-------|------|--------------|--------------|---------|
|               | (Intercept)                 | -0.11 | 0.89 | 0.85         | 0.94         | 0.000   |
| Mental health | No depression/anxiety (ref) |       | 1.00 |              |              |         |
|               | Depression only             | 0.39  | 1.48 | 1.27         | 1.74         | 0.000   |
|               | Anxiety only                | -0.13 | 0.88 | 0.74         | 1.05         | 0.152   |

|  |                        |      |      |      |      |       |
|--|------------------------|------|------|------|------|-------|
|  | Depression and anxiety | 0.00 | 1.00 | 0.90 | 1.12 | 0.951 |
|--|------------------------|------|------|------|------|-------|

Supplementary Table 2f

Model 2

| Variable      | Category                    | beta  | OR   | Lower 95% CI | Upper 95% CI | p-value |
|---------------|-----------------------------|-------|------|--------------|--------------|---------|
|               | (Intercept)                 | -0.57 | 0.57 | 0.45         | 0.72         | 0.000   |
| Mental health | No depression/anxiety (ref) |       | 1.00 |              |              |         |
|               | Depression only             | 0.46  | 1.58 | 1.34         | 1.86         | 0.000   |
|               | Anxiety only                | -0.05 | 0.95 | 0.80         | 1.14         | 0.601   |
|               | Depression and anxiety      | 0.14  | 1.15 | 1.02         | 1.30         | 0.022   |
| Gender        | Male (ref)                  |       | 1.00 |              |              |         |
|               | Female                      | -0.09 | 0.91 | 0.83         | 1.00         | 0.043   |
| Age           | 18-24 (ref)                 |       | 1.00 |              |              |         |
|               | 25-39                       | 0.25  | 1.29 | 1.08         | 1.54         | 0.005   |
|               | 40-54                       | 0.49  | 1.63 | 1.37         | 1.96         | 0.000   |
|               | 55 and up                   | 0.80  | 2.23 | 1.87         | 2.68         | 0.000   |
| Ethnicity     | Minority group              |       | 1.00 |              |              |         |
|               | Majority group              | -0.22 | 0.81 | 0.70         | 0.92         | 0.002   |
| Education     | Low (ref)                   |       | 1.00 |              |              |         |
|               | Moderate                    | -0.02 | 0.98 | 0.88         | 1.09         | 0.737   |
|               | High                        | -0.25 | 0.78 | 0.69         | 0.89         | 0.000   |
| Income        | Low (ref)                   |       | 1.00 |              |              |         |
|               | Moderate                    | 0.05  | 1.05 | 0.94         | 1.18         | 0.365   |
|               | High                        | 0.00  | 1.00 | 0.89         | 1.13         | 0.986   |
|               | No answer                   | 0.02  | 1.02 | 0.82         | 1.26         | 0.876   |
| Country       | England (ref)               |       | 1.00 |              |              |         |
|               | Australia                   | 0.46  | 1.58 | 1.37         | 1.83         | 0.000   |
|               | Canada                      | 0.12  | 1.13 | 1.01         | 1.26         | 0.040   |
|               | US                          | 0.55  | 1.73 | 1.52         | 1.96         | 0.000   |



Supplementary Table 2g

## Model 3 (fully adjusted)

| Variable                      | Category                    | beta  | OR   | Lower 95% CI | Upper 95% CI | p-value |
|-------------------------------|-----------------------------|-------|------|--------------|--------------|---------|
|                               | (Intercept)                 | -0.35 | 0.71 | 0.55         | 0.90         | 0.006   |
| Mental health                 | No depression/anxiety (ref) |       | 1.00 |              |              |         |
|                               | Depression only             | 0.45  | 1.58 | 1.34         | 1.86         | 0.000   |
|                               | Anxiety only                | -0.06 | 0.94 | 0.79         | 1.12         | 0.493   |
|                               | Depression and anxiety      | 0.14  | 1.14 | 1.01         | 1.29         | 0.031   |
| Gender                        | Male (ref)                  |       | 1.00 |              |              |         |
|                               | Female                      | -0.11 | 0.89 | 0.81         | 0.98         | 0.016   |
| Age                           | 18-24 (ref)                 |       | 1.00 |              |              |         |
|                               | 25-39                       | 0.16  | 1.17 | 0.98         | 1.41         | 0.090   |
|                               | 40-54                       | 0.34  | 1.40 | 1.17         | 1.69         | 0.000   |
|                               | 55 and up                   | 0.65  | 1.92 | 1.60         | 2.31         | 0.000   |
| Ethnicity                     | Minority group              |       | 1.00 |              |              |         |
|                               | Majority group              | -0.23 | 0.79 | 0.69         | 0.91         | 0.001   |
| Education                     | Low (ref)                   |       | 1.00 |              |              |         |
|                               | Moderate                    | 0.03  | 1.03 | 0.92         | 1.14         | 0.627   |
|                               | High                        | -0.14 | 0.87 | 0.76         | 0.99         | 0.039   |
| Income                        | Low (ref)                   |       | 1.00 |              |              |         |
|                               | Moderate                    | 0.05  | 1.05 | 0.94         | 1.18         | 0.367   |
|                               | High                        | 0.04  | 1.04 | 0.92         | 1.18         | 0.515   |
|                               | No answer                   | 0.06  | 1.07 | 0.86         | 1.33         | 0.570   |
| Country                       | England (ref)               |       | 1.00 |              |              |         |
|                               | Australia                   | 0.46  | 1.58 | 1.36         | 1.82         | 0.000   |
|                               | Canada                      | 0.16  | 1.17 | 1.05         | 1.32         | 0.007   |
|                               | US                          | 0.60  | 1.82 | 1.60         | 2.08         | 0.000   |
| Problematic alcohol use (Y/N) | No                          |       | 1.00 |              |              |         |
|                               | Yes                         | 0.00  | 1.00 | 0.90         | 1.10         | 0.939   |
|                               | No answer                   | -0.20 | 0.82 | 0.63         | 1.06         | 0.129   |
| Cigarette smoking status      | Daily (ref)                 |       | 1.00 |              |              |         |
|                               | Non-daily                   | -0.72 | 0.49 | 0.42         | 0.57         | 0.000   |
|                               | Former                      | -0.67 | 0.51 | 0.44         | 0.60         | 0.000   |

Supplementary Table 2h

## Model 4 (country-differences)

| Variable                               | Category                            | beta  | OR   | Lower 95% CI | Upper 95% CI | p-value |
|----------------------------------------|-------------------------------------|-------|------|--------------|--------------|---------|
|                                        | (Intercept)                         | -0.32 | 0.73 | 0.56         | 0.93         | 0.013   |
| Mental health                          | No depression/anxiety (ref)         |       | 1.00 |              |              |         |
|                                        | Depression only                     | 0.59  | 1.81 | 1.41         | 2.32         | 0.000   |
|                                        | Anxiety only                        | -0.18 | 0.84 | 0.58         | 1.19         | 0.330   |
|                                        | Depression and anxiety              | 0.01  | 1.01 | 0.82         | 1.23         | 0.954   |
| Country                                | England (ref)                       |       | 1.00 |              |              |         |
|                                        | Australia                           | 0.31  | 1.37 | 1.14         | 1.64         | 0.001   |
|                                        | Canada                              | 0.14  | 1.15 | 1.00         | 1.32         | 0.047   |
|                                        | US                                  | 0.64  | 1.90 | 1.62         | 2.23         | 0.000   |
| Gender                                 | Male (ref)                          |       | 1.00 |              |              |         |
|                                        | Female                              | -0.11 | 0.89 | 0.81         | 0.98         | 0.017   |
| Age                                    | 18-24 (ref)                         |       | 1.00 |              |              |         |
|                                        | 25-39                               | 0.14  | 1.15 | 0.96         | 1.38         | 0.130   |
|                                        | 40-54                               | 0.33  | 1.39 | 1.16         | 1.67         | 0.000   |
|                                        | 55 and up                           | 0.64  | 1.90 | 1.58         | 2.29         | 0.000   |
| Ethnicity                              | Minority group                      |       | 1.00 |              |              |         |
|                                        | Majority group                      | -0.22 | 0.80 | 0.70         | 0.92         | 0.002   |
| Education                              | Low (ref)                           |       | 1.00 |              |              |         |
|                                        | Moderate                            | 0.02  | 1.02 | 0.92         | 1.14         | 0.689   |
|                                        | High                                | -0.14 | 0.87 | 0.76         | 1.00         | 0.048   |
| Income                                 | Low (ref)                           |       | 1.00 |              |              |         |
|                                        | Moderate                            | 0.05  | 1.05 | 0.94         | 1.18         | 0.408   |
|                                        | High                                | 0.04  | 1.04 | 0.92         | 1.17         | 0.566   |
|                                        | No answer                           | 0.05  | 1.05 | 0.84         | 1.31         | 0.667   |
| Problematic alcohol use (Y/N)          | No                                  |       | 1.00 |              |              |         |
|                                        | Yes                                 | 0.00  | 1.00 | 0.91         | 1.11         | 0.968   |
|                                        | No answer                           | -0.20 | 0.82 | 0.63         | 1.06         | 0.131   |
| Cigarette smoking status               | Daily (ref)                         |       | 1.00 |              |              |         |
|                                        | Non-daily                           | -0.72 | 0.49 | 0.42         | 0.57         | 0.000   |
|                                        | Former                              | -0.67 | 0.51 | 0.44         | 0.60         | 0.000   |
| Mental health*country interaction term | No depression/anxiety*England (ref) |       | 1.00 |              |              |         |

|  |                                  |       |      |      |      |       |
|--|----------------------------------|-------|------|------|------|-------|
|  | Depression only*Australia        | 0.17  | 1.19 | 0.73 | 1.94 | 0.490 |
|  | Anxiety only*Australia           | 0.76  | 2.15 | 1.20 | 3.89 | 0.011 |
|  | Depression and anxiety*Australia | 0.36  | 1.44 | 1.01 | 2.04 | 0.044 |
|  | Depression only*Canada           | -0.30 | 0.74 | 0.49 | 1.12 | 0.150 |
|  | Anxiety only*Canada              | 0.16  | 1.17 | 0.74 | 1.87 | 0.508 |
|  | Depression and anxiety*Canada    | 0.18  | 1.20 | 0.89 | 1.62 | 0.235 |
|  | Depression only*US               | -0.56 | 0.57 | 0.36 | 0.92 | 0.020 |
|  | Anxiety only*US                  | -0.21 | 0.81 | 0.49 | 1.35 | 0.420 |
|  | Depression and anxiety*US        | 0.12  | 1.13 | 0.82 | 1.55 | 0.468 |

Likelihood-ratio test between Model 3 (fully adjusted) and Model 4 (country-differences): p=0.009

### RQ3: Discussion about nicotine vaping products

Supplementary Table 2i

#### Model 1

| Variable      | Category                    | beta  | OR   | Lower 95% CI | Upper 95% CI | p-value |
|---------------|-----------------------------|-------|------|--------------|--------------|---------|
|               | (Intercept)                 | -2.87 | 0.06 | 0.05         | 0.06         | 0.000   |
| Mental health | No depression/anxiety (ref) |       | 1.00 |              |              |         |
|               | Depression only             | 0.33  | 1.40 | 1.02         | 1.88         | 0.032   |
|               | Anxiety only                | 0.27  | 1.30 | 0.92         | 1.81         | 0.126   |
|               | Depression and anxiety      | 0.42  | 1.52 | 1.22         | 1.89         | 0.000   |

Supplementary Table 2j

#### Model 2

| Variable      | Category                    | beta  | OR   | Lower 95% CI | Upper 95% CI | p-value |
|---------------|-----------------------------|-------|------|--------------|--------------|---------|
|               | (Intercept)                 | -1.99 | 0.14 | 0.09         | 0.21         | 0.000   |
| Mental health | No depression/anxiety (ref) |       | 1.00 |              |              |         |
|               | Depression only             | 0.36  | 1.44 | 1.04         | 1.95         | 0.023   |
|               | Anxiety only                | 0.37  | 1.45 | 1.01         | 2.03         | 0.036   |
|               | Depression and anxiety      | 0.50  | 1.65 | 1.30         | 2.09         | 0.000   |
| Gender        | Male (ref)                  |       | 1.00 |              |              |         |

|           |                |       |      |      |      |       |
|-----------|----------------|-------|------|------|------|-------|
|           | Female         | -0.31 | 0.73 | 0.61 | 0.88 | 0.001 |
| Age       | 18-24 (ref)    |       | 1.00 |      |      |       |
|           | 25-39          | -0.14 | 0.87 | 0.64 | 1.21 | 0.399 |
|           | 40-54          | -0.28 | 0.76 | 0.55 | 1.05 | 0.093 |
|           | 55 and up      | -0.29 | 0.75 | 0.54 | 1.05 | 0.092 |
| Ethnicity | Minority group |       | 1.00 |      |      |       |
|           | Majority group | -0.39 | 0.68 | 0.53 | 0.87 | 0.002 |
| Education | Low (ref)      |       | 1.00 |      |      |       |
|           | Moderate       | 0.00  | 1.00 | 0.80 | 1.26 | 0.988 |
|           | High           | 0.09  | 1.09 | 0.83 | 1.44 | 0.531 |
| Income    | Low (ref)      |       | 1.00 |      |      |       |
|           | Moderate       | 0.06  | 1.06 | 0.83 | 1.35 | 0.654 |
|           | High           | 0.32  | 1.38 | 1.07 | 1.77 | 0.012 |
|           | No answer      | 0.10  | 1.11 | 0.68 | 1.71 | 0.668 |
| Country   | England (ref)  |       | 1.00 |      |      |       |
|           | Australia      | -1.13 | 0.32 | 0.22 | 0.46 | 0.000 |
|           | Canada         | -0.53 | 0.59 | 0.46 | 0.74 | 0.000 |
|           | US             | -0.43 | 0.65 | 0.50 | 0.84 | 0.001 |

Supplementary Table 2k

Model 3 (fully adjusted)

| Variable      | Category                    | beta  | OR   | Lower 95% CI | Upper 95% CI | p-value |
|---------------|-----------------------------|-------|------|--------------|--------------|---------|
|               | (Intercept)                 | -2.06 | 0.13 | 0.08         | 0.20         | 0.000   |
| Mental health | No depression/anxiety (ref) |       | 1.00 |              |              |         |
|               | Depression only             | 0.36  | 1.44 | 1.04         | 1.95         | 0.023   |
|               | Anxiety only                | 0.37  | 1.45 | 1.01         | 2.03         | 0.037   |
|               | Depression and anxiety      | 0.49  | 1.63 | 1.29         | 2.06         | 0.000   |
| Gender        | Male (ref)                  |       | 1.00 |              |              |         |
|               | Female                      | -0.29 | 0.75 | 0.62         | 0.91         | 0.004   |
| Age           | 18-24 (ref)                 |       | 1.00 |              |              |         |
|               | 25-39                       | -0.11 | 0.89 | 0.65         | 1.24         | 0.501   |
|               | 40-54                       | -0.25 | 0.78 | 0.56         | 1.10         | 0.149   |
|               | 55 and up                   | -0.24 | 0.78 | 0.56         | 1.11         | 0.163   |
| Ethnicity     | Minority group              |       | 1.00 |              |              |         |
|               | Majority group              | -0.41 | 0.67 | 0.52         | 0.86         | 0.002   |

|                               |               |       |      |      |      |       |
|-------------------------------|---------------|-------|------|------|------|-------|
| Education                     | Low (ref)     |       | 1.00 |      |      |       |
|                               | Moderate      | -0.01 | 0.99 | 0.79 | 1.25 | 0.938 |
|                               | High          | 0.08  | 1.09 | 0.82 | 1.43 | 0.556 |
| Income                        | Low (ref)     |       | 1.00 |      |      |       |
|                               | Moderate      | 0.05  | 1.05 | 0.82 | 1.34 | 0.698 |
|                               | High          | 0.31  | 1.36 | 1.06 | 1.75 | 0.016 |
|                               | No answer     | 0.12  | 1.12 | 0.70 | 1.75 | 0.615 |
| Country                       | England (ref) |       | 1.00 |      |      |       |
|                               | Australia     | -1.11 | 0.33 | 0.22 | 0.47 | 0.000 |
|                               | Canada        | -0.54 | 0.58 | 0.46 | 0.74 | 0.000 |
|                               | US            | -0.41 | 0.67 | 0.51 | 0.86 | 0.002 |
| Problematic alcohol use (Y/N) | No            |       | 1.00 |      |      |       |
|                               | Yes           | 0.14  | 1.15 | 0.94 | 1.39 | 0.180 |
|                               | No answer     | -0.40 | 0.67 | 0.34 | 1.19 | 0.210 |
| Cigarette smoking status      | Daily (ref)   |       | 1.00 |      |      |       |
|                               | Non-daily     | 0.16  | 1.18 | 0.89 | 1.54 | 0.240 |
|                               | Former        | -0.12 | 0.89 | 0.64 | 1.20 | 0.462 |

Supplementary Table 2I

Model 4 (country-differences)

| Variable      | Category                    | beta  | OR   | Lower 95% CI | Upper 95% CI | p-value |
|---------------|-----------------------------|-------|------|--------------|--------------|---------|
|               | (Intercept)                 | -2.10 | 0.12 | 0.08         | 0.19         | 0.000   |
| Mental health | No depression/anxiety (ref) |       | 1.00 |              |              |         |
|               | Depression only             | 0.45  | 1.57 | 1.02         | 2.34         | 0.033   |
|               | Anxiety only                | 0.73  | 2.07 | 1.21         | 3.39         | 0.005   |
|               | Depression and anxiety      | 0.40  | 1.50 | 1.06         | 2.09         | 0.019   |
| Country       | England (ref)               |       | 1.00 |              |              |         |
|               | Australia                   | -1.04 | 0.35 | 0.21         | 0.56         | 0.000   |
|               | Canada                      | -0.49 | 0.61 | 0.46         | 0.82         | 0.001   |
|               | US                          | -0.42 | 0.66 | 0.47         | 0.92         | 0.015   |
| Gender        | Male (ref)                  |       | 1.00 |              |              |         |
|               | Female                      | -0.29 | 0.75 | 0.62         | 0.91         | 0.004   |
| Age           | 18-24 (ref)                 |       | 1.00 |              |              |         |
|               | 25-39                       | -0.10 | 0.91 | 0.66         | 1.26         | 0.562   |
|               | 40-54                       | -0.23 | 0.80 | 0.57         | 1.12         | 0.178   |

|                                        |                                     |       |      |      |      |       |
|----------------------------------------|-------------------------------------|-------|------|------|------|-------|
|                                        | 55 and up                           | -0.22 | 0.80 | 0.57 | 1.14 | 0.207 |
| Ethnicity                              | Minority group                      |       | 1.00 |      |      |       |
|                                        | Majority group                      | -0.40 | 0.67 | 0.52 | 0.87 | 0.002 |
| Education                              | Low (ref)                           |       | 1.00 |      |      |       |
|                                        | Moderate                            | 0.00  | 1.00 | 0.79 | 1.26 | 0.990 |
|                                        | High                                | 0.10  | 1.11 | 0.84 | 1.46 | 0.481 |
| Income                                 | Low (ref)                           |       | 1.00 |      |      |       |
|                                        | Moderate                            | 0.04  | 1.04 | 0.81 | 1.32 | 0.768 |
|                                        | High                                | 0.30  | 1.34 | 1.05 | 1.73 | 0.021 |
|                                        | No answer                           | 0.13  | 1.14 | 0.70 | 1.76 | 0.585 |
| Problematic alcohol use (Y/N)          | No                                  |       | 1.00 |      |      |       |
|                                        | Yes                                 | 0.15  | 1.16 | 0.95 | 1.41 | 0.150 |
|                                        | No answer                           | -0.41 | 0.67 | 0.34 | 1.18 | 0.200 |
| Cigarette smoking status               | Daily (ref)                         |       | 1.00 |      |      |       |
|                                        | Non-daily                           | 0.17  | 1.18 | 0.89 | 1.55 | 0.227 |
|                                        | Former                              | -0.12 | 0.88 | 0.64 | 1.19 | 0.434 |
| Mental health*country interaction term | No depression/anxiety*England (ref) |       | 1.00 |      |      |       |
|                                        | Depression only*Australia           | 0.33  | 1.39 | 0.47 | 3.67 | 0.519 |
|                                        | Anxiety only*Australia              | -1.47 | 0.23 | 0.01 | 1.22 | 0.159 |
|                                        | Depression and anxiety*Australia    | -0.14 | 0.87 | 0.34 | 2.06 | 0.758 |
|                                        | Depression only*Canada              | -0.36 | 0.70 | 0.27 | 1.59 | 0.417 |
|                                        | Anxiety only*Canada                 | -0.49 | 0.61 | 0.26 | 1.37 | 0.240 |
|                                        | Depression and anxiety*Canada       | 0.07  | 1.07 | 0.60 | 1.88 | 0.806 |
|                                        | Depression only*US                  | -0.40 | 0.67 | 0.24 | 1.63 | 0.404 |
|                                        | Anxiety only*US                     | -0.57 | 0.57 | 0.22 | 1.37 | 0.222 |
|                                        | Depression and anxiety*US           | 0.37  | 1.44 | 0.82 | 2.53 | 0.202 |

Likelihood-ratio test between Model 3 (fully adjusted) and Model 4 (country-differences): p=0.415

## RQ4: Positive recommendation to use nicotine vaping products

Supplementary Table 2m

### Model 1

| Variable      | Category                    | beta     | OR   | Lower 95% CI | Upper 95% CI | p-value |
|---------------|-----------------------------|----------|------|--------------|--------------|---------|
|               | (Intercept)                 | -0.78697 | 0.46 | 0.37         | 0.55         | 0.000   |
| Mental health | No depression/anxiety (ref) |          | 1.00 |              |              |         |
|               | Depression only             | 0.329851 | 1.39 | 0.87         | 2.21         | 0.166   |
|               | Anxiety only                | 0.259387 | 1.30 | 0.76         | 2.17         | 0.331   |
|               | Depression and anxiety      | 0.167331 | 1.18 | 0.83         | 1.67         | 0.343   |

Supplementary Table 2n

### Model 2

| Variable      | Category                    | beta     | OR   | Lower 95% CI | Upper 95% CI | p-value |
|---------------|-----------------------------|----------|------|--------------|--------------|---------|
|               | (Intercept)                 | -0.78584 | 0.46 | 0.22         | 0.92         | 0.029   |
| Mental health | No depression/anxiety (ref) |          | 1.00 |              |              |         |
|               | Depression only             | 0.328175 | 1.39 | 0.83         | 2.30         | 0.204   |
|               | Anxiety only                | 0.06195  | 1.06 | 0.60         | 1.86         | 0.831   |
|               | Depression and anxiety      | 0.247724 | 1.28 | 0.86         | 1.90         | 0.218   |
| Gender        | Male (ref)                  |          | 1.00 |              |              |         |
|               | Female                      | -0.4939  | 0.61 | 0.45         | 0.83         | 0.002   |
| Age           | 18-24 (ref)                 |          | 1.00 |              |              |         |
|               | 25-39                       | 0.354833 | 1.43 | 0.87         | 2.37         | 0.164   |
|               | 40-54                       | -0.49003 | 0.61 | 0.36         | 1.05         | 0.073   |
|               | 55 and up                   | -0.32982 | 0.72 | 0.42         | 1.24         | 0.233   |
| Ethnicity     | Minority group              |          | 1.00 |              |              |         |
|               | Majority group              | 0.252891 | 1.29 | 0.83         | 2.01         | 0.259   |
| Education     | Low (ref)                   |          | 1.00 |              |              |         |
|               | Moderate                    | 0.196878 | 1.22 | 0.82         | 1.82         | 0.334   |
|               | High                        | 0.556871 | 1.75 | 1.10         | 2.78         | 0.019   |
| Income        | Low (ref)                   |          | 1.00 |              |              |         |
|               | Moderate                    | 0.023276 | 1.02 | 0.68         | 1.54         | 0.911   |
|               | High                        | 0.17508  | 1.19 | 0.78         | 1.82         | 0.417   |

|         |               |          |      |      |      |       |
|---------|---------------|----------|------|------|------|-------|
|         | No answer     | -0.31529 | 0.73 | 0.30 | 1.62 | 0.457 |
| Country | England (ref) |          | 1.00 |      |      |       |
|         | Australia     | -1.28757 | 0.28 | 0.12 | 0.56 | 0.001 |
|         | Canada        | -0.04017 | 0.96 | 0.65 | 1.42 | 0.841 |
|         | US            | -0.5582  | 0.57 | 0.37 | 0.89 | 0.013 |

Supplementary Table 2o

Model 3 (fully adjusted)

| Variable                      | Category                    | beta     | OR   | Lower 95% CI | Upper 95% CI | p-value |
|-------------------------------|-----------------------------|----------|------|--------------|--------------|---------|
|                               | (Intercept)                 | -0.76783 | 0.46 | 0.22         | 0.98         | 0.045   |
| Mental health                 | No depression/anxiety (ref) |          | 1.00 |              |              |         |
|                               | Depression only             | 0.307861 | 1.36 | 0.81         | 2.26         | 0.240   |
|                               | Anxiety only                | 0.020313 | 1.02 | 0.57         | 1.81         | 0.945   |
|                               | Depression and anxiety      | 0.238358 | 1.27 | 0.85         | 1.89         | 0.240   |
| Gender                        | Male (ref)                  |          | 1.00 |              |              |         |
|                               | Female                      | -0.4655  | 0.63 | 0.45         | 0.87         | 0.005   |
| Age                           | 18-24 (ref)                 |          | 1.00 |              |              |         |
|                               | 25-39                       | 0.250262 | 1.28 | 0.77         | 2.15         | 0.338   |
|                               | 40-54                       | -0.63619 | 0.53 | 0.30         | 0.92         | 0.024   |
|                               | 55 and up                   | -0.40505 | 0.67 | 0.38         | 1.17         | 0.159   |
| Ethnicity                     | Minority group              |          | 1.00 |              |              |         |
|                               | Majority group              | 0.19366  | 1.21 | 0.78         | 1.90         | 0.393   |
| Education                     | Low (ref)                   |          | 1.00 |              |              |         |
|                               | Moderate                    | 0.264145 | 1.30 | 0.87         | 1.96         | 0.201   |
|                               | High                        | 0.726933 | 2.07 | 1.28         | 3.36         | 0.003   |
| Income                        | Low (ref)                   |          | 1.00 |              |              |         |
|                               | Moderate                    | 0.008834 | 1.01 | 0.67         | 1.53         | 0.966   |
|                               | High                        | 0.092974 | 1.10 | 0.71         | 1.69         | 0.674   |
|                               | No answer                   | -0.41987 | 0.66 | 0.27         | 1.49         | 0.333   |
| Country                       | England (ref)               |          | 1.00 |              |              |         |
|                               | Australia                   | -1.20143 | 0.30 | 0.13         | 0.62         | 0.002   |
|                               | Canada                      | 0.095251 | 1.10 | 0.73         | 1.65         | 0.645   |
|                               | US                          | -0.45725 | 0.63 | 0.40         | 0.99         | 0.048   |
| Problematic alcohol use (Y/N) | No                          |          | 1.00 |              |              |         |
|                               | Yes                         | 0.332198 | 1.39 | 0.98         | 1.97         | 0.061   |



|                          |             |          |      |      |      |       |
|--------------------------|-------------|----------|------|------|------|-------|
|                          | No answer   | 0.23702  | 1.27 | 0.41 | 3.55 | 0.661 |
| Cigarette smoking status | Daily (ref) |          | 1.00 |      |      |       |
|                          | Non-daily   | -0.49388 | 0.61 | 0.38 | 0.96 | 0.038 |
|                          | Former      | -0.45376 | 0.64 | 0.34 | 1.13 | 0.133 |

Supplementary Table 2p

Model 4 (country-differences)

| Variable                      | Category                    | beta     | OR   | Lower 95% CI | Upper 95% CI | p-value |
|-------------------------------|-----------------------------|----------|------|--------------|--------------|---------|
|                               | (Intercept)                 | -0.68906 | 0.50 | 0.23         | 1.08         | 0.081   |
| Mental health                 | No depression/anxiety (ref) |          | 1.00 |              |              |         |
|                               | Depression only             | -0.12952 | 0.88 | 0.44         | 1.72         | 0.709   |
|                               | Anxiety only                | 0.358144 | 1.43 | 0.63         | 3.28         | 0.392   |
|                               | Depression and anxiety      | 0.288494 | 1.33 | 0.76         | 2.34         | 0.316   |
| Country                       | England (ref)               |          | 1.00 |              |              |         |
|                               | Australia                   | -2.09746 | 0.12 | 0.03         | 0.40         | 0.002   |
|                               | Canada                      | 0.207044 | 1.23 | 0.73         | 2.05         | 0.430   |
|                               | US                          | -0.5784  | 0.56 | 0.30         | 1.02         | 0.064   |
| Gender                        | Male (ref)                  |          | 1.00 |              |              |         |
|                               | Female                      | -0.54273 | 0.58 | 0.41         | 0.81         | 0.002   |
| Age                           | 18-24 (ref)                 |          | 1.00 |              |              |         |
|                               | 25-39                       | 0.229897 | 1.26 | 0.75         | 2.14         | 0.392   |
|                               | 40-54                       | -0.58543 | 0.56 | 0.32         | 0.99         | 0.044   |
|                               | 55 and up                   | -0.40161 | 0.67 | 0.38         | 1.20         | 0.173   |
| Ethnicity                     | Minority group              |          | 1.00 |              |              |         |
|                               | Majority group              | 0.151895 | 1.16 | 0.74         | 1.85         | 0.514   |
| Education                     | Low (ref)                   |          | 1.00 |              |              |         |
|                               | Moderate                    | 0.256897 | 1.29 | 0.85         | 1.98         | 0.232   |
|                               | High                        | 0.70506  | 2.02 | 1.23         | 3.35         | 0.006   |
| Income                        | Low (ref)                   |          | 1.00 |              |              |         |
|                               | Moderate                    | 0.038565 | 1.04 | 0.68         | 1.60         | 0.859   |
|                               | High                        | 0.085482 | 1.09 | 0.70         | 1.71         | 0.708   |
|                               | No answer                   | -0.47473 | 0.62 | 0.25         | 1.44         | 0.285   |
| Problematic alcohol use (Y/N) | No                          |          | 1.00 |              |              |         |
|                               | Yes                         | 0.360392 | 1.43 | 1.00         | 2.06         | 0.050   |
|                               | No answer                   | 0.26229  | 1.30 | 0.41         | 3.77         | 0.638   |

|                                        |                                     |          |       |      |                            |       |
|----------------------------------------|-------------------------------------|----------|-------|------|----------------------------|-------|
| Cigarette smoking status               | Daily (ref)                         |          | 1.00  |      |                            |       |
|                                        | Non-daily                           | -0.55277 | 0.58  | 0.35 | 0.92                       | 0.025 |
|                                        | Former                              | -0.45563 | 0.63  | 0.34 | 1.16                       | 0.149 |
| Mental health*country interaction term | No depression/anxiety*England (ref) |          | 1.00  |      |                            |       |
|                                        | Depression only*Australia           | 2.801618 | 16.47 | 2.47 | 136.18                     | 0.005 |
|                                        | Anxiety only*Australia              | -10.774  | 0.00  | NA   | 22769453165899200000000000 | 0.979 |
|                                        | Depression and anxiety*Australia    | 0.719362 | 2.05  | 0.15 | 19.32                      | 0.538 |
|                                        | Depression only*Canada              | 0.933002 | 2.54  | 0.61 | 10.56                      | 0.196 |
|                                        | Anxiety only*Canada                 | -1.54585 | 0.21  | 0.04 | 0.93                       | 0.052 |
|                                        | Depression and anxiety*Canada       | -0.34615 | 0.71  | 0.27 | 1.80                       | 0.471 |
|                                        | Depression only*US                  | 0.381836 | 1.46  | 0.22 | 7.51                       | 0.663 |
|                                        | Anxiety only*US                     | 0.195571 | 1.22  | 0.24 | 5.52                       | 0.804 |
|                                        | Depression and anxiety*US           | 0.118814 | 1.13  | 0.41 | 3.09                       | 0.818 |

Likelihood-ratio test between Model 3 (fully adjusted) and Model 4 (country-differences): p=0.064

© 2023 Tildy B. E. et al.
